# Supplementary material
Source: MDPI journal article supplement (https://www.mdpi.com/1424-8247/16/8/1083)
Supplement: s1 [file s1]

# Supplementary data

Table S1. List of antibodies used.

| Antibody                       | Resource        | Identifier  |
|--------------------------------|-----------------|-------------|
| PerCP-Vio700 Anti-CD4          | Miltenyi Biotec | 130-102-271 |
| FITC Anti-CD44                 | BD              | 553133      |
| AF700 Anti-CD8                 | Invitrogen      | 2075802     |
| APC Anti-CD127                 | Invitrogen      | 2480836     |
| BV421 Anti-FR4                 | BD              | 744119      |
| PE/Cy7 Anti-CD62L              | Biolegend       | 104417      |
| PE Anti-CD25                   | MACS            | 120-001-294 |
| FITC Anti-CD3                  | BD              | 53198       |
| AF488 Goat anti-mouse IgG      | Invitrogen      | 2090562     |
| APC Cy7 Anti-Dx5               | Invitrogen      | A15420      |
| PE-TxRed Anti-CD11b            | Invitrogen      | 2159105     |
| PE Anti-Gr1                    | MACS            | 120-002-245 |
| LIVE/DEAD near-IR (ex. 633 nm) | Invitrogen      | 2339909     |
| LIVE/DEAD violet (ex. 405 nm)  | Invitrogen      | 2328981     |
